**N. Peters.** "Angeln". Handb. d. Seefisch. Nordeuropas. Bd. IV, H. 4. E. Schweizerbart'sche Verlagsbuchhandlung (Erwin Nägele) G. m. b. H., Stuttgart, 1935.

This pamphlet of 48 pages costs twenty-two shillings. So much has the price of German books increased. This part of the fourth volume of the Handbook of the Sea Fisheries of Northern Europe contains an account of line fishing by Dr. PETERS, of the Zoological Museum, Hamburg. It is a thoroughly sound, comprehensive, and up-to-date description of what is still an important branch of coastal and deep-sea fishing. After a short introduction the author gives a historical account of the various types of hooks in use from the earliest times. This section of the work is well illustrated and it is easy to follow the development of line fishing and the adaptation of different kinds of hooks to different purposes. A very interesting description is given of the tracing of the migrations of fish by means of hooks which have been left in their jaws when they have managed to free themselves. In particular there are interesting maps showing the migrations of the salmon in winter in the southern part of the Baltic and of the tunny into the Mediterranean. An extension of this method of research is plainly indicated by giving the line fishermen hooks with distinguishing marks.

The different methods of line fishing practised by inshore and deep-sea fishermen are next described; with special notes on fishing for cod, the Greenland shark, eels, and cuttlefish (these last being required for bait). A separate section deals with whiffing (Schleppangeln) for mackerel. Here again, as in fact throughout the whole work, the illustrations are well selected and serve excellently to elucidate the text.

Long-lining is then dealt with, and the Dutch line fishing is dealt with in an exhaustive manner, in great detail with reproductions of excellent photographs. The Norwegian line fishery for cod at the Lofoten islands, as well as for coalfish; and the fishery for the herring-shark (*Isurus cornubicus*) are also described. The British long-line fishery next receives attention, including the halibut fishery off the coast of Greenland initiated in 1926.

The last chapter is devoted to the bait question. Finally there is a short but satisfactory bibliography. The whole work is lucid and concise. It reflects the greatest credit on the author, Dr. PETERS, on the editors, Drs. LÜBBERT and EHRENBaum, and on the publishers. It maintains the high standard of the "*Handbuch*" and no student of the sea fisheries of Northern Europe can afford to neglect it.

J. T. J.

**F. M. Davis.** "Mesh Experiments with Trawls 1928—1933." With an Appendix by H. J. Buchanan-Wollaston. Min. Agric. and Fish., Fish. Invest. Ser. II, Vol. XIV, No. 1, 1934. London, 1935.

Welche ungeheure Menge von Arbeit und Mühe in den Untersuchungen steckt, über die hier in knappster Form berichtet wird, kann wohl nur derjenige ermesen, der sich selbst mit der Erprobung der Fangwirkung verschiedener Netzmaschen befasst hat. Alle Fischereibiologen müssen dem Verfasser dankbar sein, dass er diese Arbeit auf sich genommen hat.

Nach der Ablehnung des Planes eines Schongebiets für die Scholle in der Nordsee (1926) wurde die Frage lebhaft erörtert, ob man das Trawl

so umgestalten könnte, dass die Vernichtung untermassiger Fische eingeschränkt würde. Verschiedene Schontrawlmodelle wurden entworfen und erprobt, aber, wie Verf. im Abschnitt IX seiner Arbeit kurz darlegt, nicht bewährt erfunden. Dagegen schien es möglich, durch Verwendung gewöhnlicher aber weitmaschiger Trawls viele untermassige Rundfische zu schonen. Zunächst erhob sich die Frage, ob die Fische durch die Maschen des Steerts schon beim Schleppen, oder, wie vielfach behauptet wurde, erst beim Hieven entkämen. Im zweiten Falle war anzunehmen, dass sie grossenteils nicht mehr lebensfähig sein würden, und dass seine wesentliche Schonung daher auf diese Weise nicht zu erreichen wäre. In Abschnitt II beschreibt der Verf. eine Versuchsanordnung, die es ihm einwandfrei nachzuweisen gestattete, dass die kleinen Fische bereits während des Schleppens entkommen. Die nächste Aufgabe war es, die Selektion von Maschen verschiedener Weite bezüglich verschiedener Fischarten zu bestimmen. Sehr sorgfältige Untersuchungen wurden gemacht über die Abhängigkeit der Maschenweite von dem verwendeten Material, der Konservierung, dem Umfange der beim Stricken benutzten Spule etc. Die Tabelle xvi des Anhangs enthält die näheren Angaben über die Befunde und gibt erwünschte Gelegenheit, die Maschenweite verschiedener Netze einwandfrei zu vergleichen. Für die Feststellung der Selektion der Maschen kommen verschiedene Methoden in Betracht. Da ist einmal das von Russell und Edser eingeführte Hosentrawl (trouser trawl). Verf. findet, dass die Fangmenge in dem beim Einholen achttern befindlichen Steert auch bei gleicher Maschenweite erheblich grösser ist. Diese Fehlerquelle wird ausgeschaltet, wenn man zwischen je zwei Versuchsfängen die beiden Steerte miteinander vertauscht. Unter dieser Bedingung hält Verf. die Methode für geeignet zur vorläufigen Orientierung.

Die zweite Methode, vom Forschungsdampfer auf dem gleichen Fangplatz abwechselnd mit den beiden zu vergleichenden Steerten zu fischen, hat, wie Abschnitt VIII lehrt, nicht den gewünschten Erfolg gehabt. Offenbar änderte sich während der Versuche die Fischbevölkerung des Fangplatzes zu stark (Ref. hat mit dieser Methode im Schollengebiet der Deutschen Bucht bessere Erfahrungen gemacht. Es zeigte sich aber auch hier, dass sehr weitmaschige Netze weniger grosse Fische fingen als das engmaschige Vergleichsnetz. Dies deutet auf einen methodischen Fehler).

Ausgedehnte Versuche, über die in Abschnitt IV und V berichtet wird, wurden mit Decksteernetzen angestellt. Bei diesem Gerät gibt der Prozentsatz der in den Decksteert gelangten Fische jeder Länge vom Gesamtfang des Geräts ohne weiteres die "Selektions-Ogive". Im Anhang zeigt Buchanan-Wollaston, dass dies der klarste, richtigste und vollständigste Ausdruck für die Selektion der verwendeten Netzmasche ist, und warnt vor der schematischen Angabe des Prozentsatzes der entkommenen und zurückgehaltenen Fische ober- und unterhalb einer bestimmten Länge, da dieser Prozentsatz weitgehend von der Zusammensetzung der befisheten Bevölkerung abhängig ist. Davis' Kontrollversuche zeigen leider, dass die Fangwirkung der Steertmaschen durch das darüber angebrachte Decknetz beeinflusst wird. Es werden zuviel kleine Fische im Innensteert zurückgehalten, und der 50 % Punkt der Selektions-Ogive (Scheidewert) liegt zu tief. (Bei den Schollenfängen des Ref. betrug dieser Fehler fast 4 cm.). Ausserdem werden in dem Steert mit Decknetz zu wenig grosse Fische gefangen, wahrscheinlich weil das Decknetz den "Zug" des Netzes herabsetzt. Der Versuch, eine rechnerische Korrektur anzubringen, befriedigt nicht, und so werden die Ergebnisse der Decknetzfangen nur benutzt, um die Selektionswirkung bezüglich verschiedener Fischarten zu vergleichen.

Ausschlaggebend ist das grosse Experiment, das unter wissenschaftlicher

Kontrolle von der praktischen Fischerei durchgeführt wurde. Zwei Fischdampfer einer Reederei in Shields, Schwesterschiffe, führten gemeinsam 12 Fangreisen aus, wobei das eine mit dem handelsüblichen, das andere mit einem weitmaschigen Netz fischten. Hierin wechselten sich die beiden Schiffe ab, um die "persönlichen" Fehler auszuschalten. An Bord wurden laufend sorgfältige Untersuchungen über die Maschenweite der Netze, die Menge der gefangenen Fische aller Arten und Marktsorten, die Menge der mitgefangenen untermassigen Fische und des Beifangs von Wirbellosen etc. sowie vor allem Messungen der Länge der Schellfische, marktfähiger und untermassiger, vorgenommen. Im Hafen wurden Gewicht und Geldertrag der Anlandungen beider Schiffe ermittelt. Es zeigte sich, dass die mit dem weitmaschigen Netz gemachten Fänge einen etwas höheren Geldertrag lieferten als die mit dem normalen Netz, trotzdem erhebliche Mengen kleiner Schellfische bis zu 30 cm. Länge durch die weiten Maschen entkommen waren, die das normale Netz zurückgehalten hatte und die z. T. auch als marktfähig gelandet waren. Das weitmaschige Netz fing indessen absolut mehr grosse Schellfische, die wegen der geringeren Beifangmenge auch weniger gedrückt waren, und dies genügte, um den der Zahl nach erheblichen Ausfall der kleinen nach Gewicht und Wert auszugleichen. Würden weitmaschige Netze allgemein eingeführt werden, so würde der Vorteil infolge der Schonung untermassiger Rundfische mit der Zeit noch erheblich grösser werden. Der einwandfreie Nachweis, dass die Verwendung weiterer Maschen von vorn herein keinen wirtschaftlichen Nachteil bringt, wird die allgemeine Einführung schonenderer Geräte sehr erleichtern.

*Bckm.*

**R. Kändler.** "Rassenkundliche Untersuchungen an Plattfischen. I. Variabilitätsstudien an den Flossenstrahlen- und Wirbelzahlen der Ostseeschollen." Ber. deutsch. Komm. f. Meeresf. N.F., Bd. VII, H. 4. Leipzig, 1935.

This paper deals chiefly with racial differences of plaice populations from different parts of the Baltic, but contains also some information about the plaice of the North Sea. The author divides the Baltic in the usual way into two parts, viz., the Western Baltic, comprising the Bay of Kiel and the Bay of Mecklenburg up to the line Gedser — Darsser Ort, and the "Baltic proper" ("eigentliche Ostsee"), being the remaining part east of that line.

After some preliminary remarks on the validity of "races" and "racial differences" in general the author comes to the conclusion that morphological characters alone are not always sufficient to define a race, but that it is necessary, especially in the case of fish, to take into account also biological data (spawning place and spawning time, distribution of eggs and larvae, etc.). As to the morphological characters he rightly points out, that in racial investigations only such numerical characters should be used as are constant during life.

Kändler confines himself in this study to the numbers of the vertebrae and of the rays of the anal fin. He gives a detailed account of the methods followed and lays much stress upon the staining of these bony structures with alizarine, by which elements containing calcium are beautifully coloured.

An important part of his paper is devoted to a very useful description
